# Supplementary material for: AtERF71/HRE2, an Arabidopsis AP2/ERF Transcription Factor Gene, Contains Both Positive and Negative Cis-Regulatory Elements in Its Promoter Region Involved in Hypoxia and Salt Stress Responses
Source: MDPI journal article supplement (doi:10.3390/ijms23105310), 2022-05-10
Supplement: s1 [file s1]

## Supplementary data

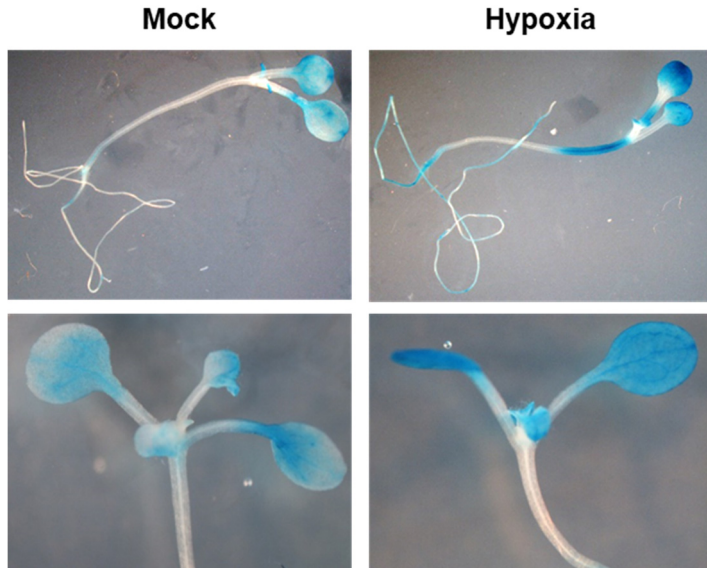

**Figure S1.** *HRE2* promoter analysis under hypoxic condition. Histochemical GUS assay for Arabidopsis T<sub>2</sub> transgenic plants carrying the -180 of *HRE2* promoter at 12 DAG under hypoxic condition. Hypoxia was induced using 99.9% N<sub>2</sub> gas for 12 h. GUS activity was observed in at least 15 transgenic plants; representative staining results are shown here.

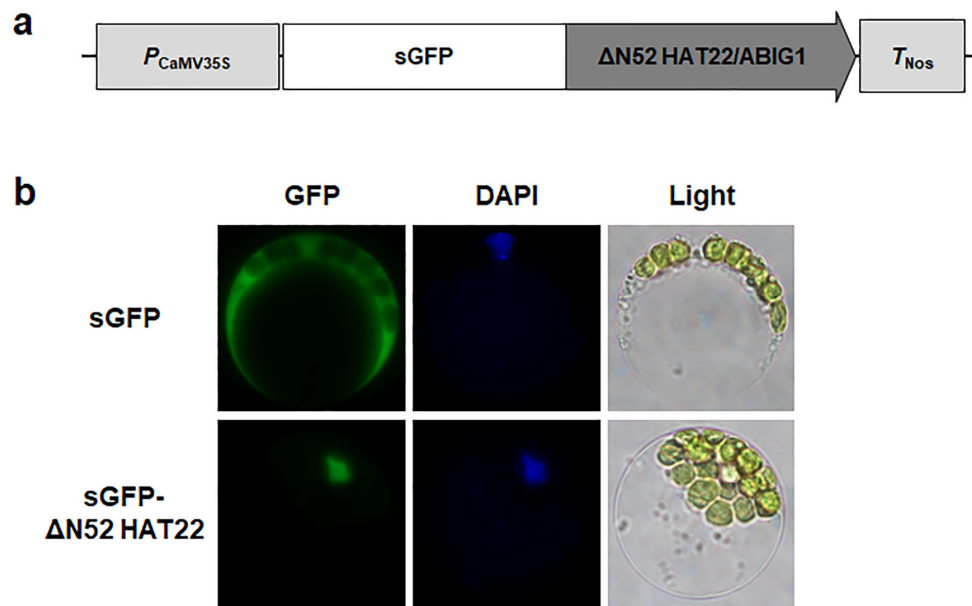

**Figure S2.** Subcellular localization of  $\Delta$ N52 HAT22/ABIG1. **(a)** A schematic map of sGFP-fused  $\Delta$ N52 HAT22/ABIG1 vector. **(b)** Transient expression of sGFP- $\Delta$ N52 HAT22/ABIG1 fusion protein in Arabidopsis protoplasts. Left, GFP signal; middle, DAPI staining; right, light microscopy images.

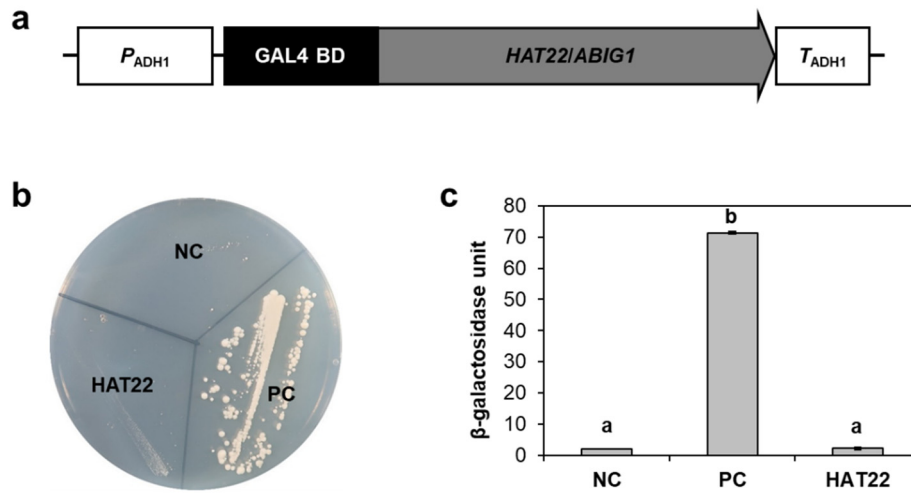

**Figure S3.** Transactivation activity of HAT22/ABIG1. **(a)** A schematic map of GAL4 BD-fusion HAT22/ABIG1 vector for the analysis of transactivation activity in yeast. **(b)** Yeast growth assay. Yeast transformants were grown on SM-Trp/-Ura. **(c)** Quantitative  $\beta$ -galactosidase ONPG assay.  $\beta$ -Galactosidase activities were used for transactivation activity quantification. Data are shown as means  $\pm$  S.D. ( $n = 3$ ). Different letters display significant differences ( $P < 0.05$ ). In **(b)** and **(c)**, empty pBD-GAL4 vector and HRE1 were used for the negative and positive controls, respectively.

```

      5' -AGTATT
-110 TGATGTGGGA
-100 GTAGAAATAA
-90  TTAAGAAAGC
-80  GTTATGGTTC
-70  AAATGATAAC
-60  TGCAAATTCT
-50  ATGATTAATT
-40  AACTTATTAT
-30  TATTTATAAG
-20  TTGTTAATGG
-10  TAGTTGCA-3'

```

**Figure S4.** Identification of HD-Zip II-binding-like *cis*-regulatory element(s) in *HRE2* promoter. Sequence of hypoxia- and salt-responsive region of *HRE2* promoter from -116 to -2 region is presented. The core sequence of HD-Zip II-binding-like *cis*-regulatory element, AATGATA, is marked in red and underline.

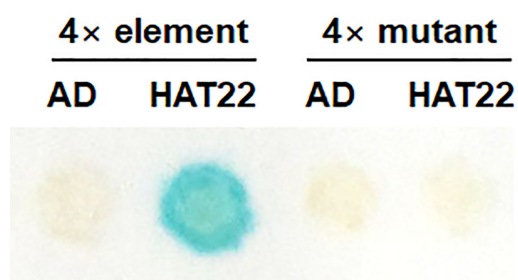

**Figure S5.** Confirmation of binding of HAT22/ABIG1 to HD-Zip II-binding-like *cis*-regulatory element in yeast. Yeast one-hybrid assay for HAT22/ABIG1 and HD-Zip II-binding-like *cis*-regulatory element or mutant HD-Zip II-binding-like *cis*-regulatory element using  $\beta$ -galactosidase filter assay. 5-bromo-4-chloro-3-indolyl- $\beta$ -D-galactopyranoside was used as the substrate. The reaction was performed for 6 h.

**Table S1.** Yeast one-hybrid screening. Results of yeast one-hybrid screens using -116 to -2 region of *HRE2* as bait and hypoxia-treated Arabidopsis cDNA library as prey.

| <b>Total no. of transformants</b> | <b>No. of positive colonies</b> | <b>No. of isolated genes</b> |
|-----------------------------------|---------------------------------|------------------------------|
| $8.8 \times 10^5$                 | 25 colonies                     | 13 genes                     |

**Table S2.** List of genes isolated from yeast one-hybrid screening

| Locus ID  | Gene            | No. of selected yeast colonies | Description                                                            |
|-----------|-----------------|--------------------------------|------------------------------------------------------------------------|
| At5g53980 | HB52            | 1                              | HD-Zip TF family, class I subfamily                                    |
| At4g37790 | HAT22/ABIG1     | 1                              | HD-Zip TF family, class II subfamily, subgroup $\beta$                 |
| At5g47370 | HAT2            | 1                              | HD-Zip TF family, class II subfamily, subgroup $\gamma$                |
| At4g16780 | HAT4/HB2/HB-2   | 1                              | HD-Zip TF family, class II subfamily, subgroup $\gamma$                |
| At3g60390 | HAT3            | 3                              | HD-Zip TF family, class II subfamily, subgroup $\delta$                |
| At2g44910 | HB4/HB-4        | 1                              | HD-Zip TF family, class II subfamily, subgroup $\delta$                |
| At2g18350 | HB24/ZHD6/ZFHD6 | 2                              | ZF-HD                                                                  |
| At5g65410 | HB25/ZHD1/ZFHD2 | 1                              | ZF-HD                                                                  |
| At1g75240 | HB33/ZHD5       | 10                             | ZF-HD                                                                  |
| At1g09200 | H3.1/HTR2       | 1                              | Histone superfamily protein                                            |
| At4g40040 | H3.3/HTR5       | 1                              | Histone superfamily protein                                            |
| At5g10980 | H3.3/HTR8       | 1                              | Histone superfamily protein                                            |
| At1g76110 | At1g76110       | 1                              | HMG box protein with ARID/BRIGHT DNA-binding domain-containing protein |

**Table S3.** List of primers for cloning

| Construct                          | Forward                                    | Reverse                                  |
|------------------------------------|--------------------------------------------|------------------------------------------|
| <i>HRE2</i> promoter<br>-180       | 5'-GCGAAGCTTTTAGAT<br>AAATTAACATAAAC-3'    | 5'-GCGCTGCAGTTTTGT<br>TTTTGTTTTTTAC-3'   |
| <i>HRE2</i> promoter<br>-116       | 5'-GCGAAGCTTAGTATT<br>TGATGTGGGAGTAG-3'    | 5'-GCGCTGCAGTTTTGT<br>TTTTGTTTTTTAC-3'   |
| <i>HRE2</i> promoter<br>-2         | 5'-GCGAAGCTTAAAGGT<br>TATAGAGCACACAG-3'    | 5'-GCGCTGCAGTTTTGT<br>TTTTGTTTTTTAC-3'   |
| <i>HRE2</i> promoter<br>+52        | 5'-GCGAAGCTTGAAGAA<br>CTTGGTCGTCAAGC-3'    | 5'-GCGCTGCAGTTTTGT<br>TTTTGTTTTTTAC-3'   |
| <i>HRE2</i> promoter<br>-116 to -2 | 5'-CGCGTCGACAGTATT<br>TGATGTGGGAGTAG-3'    | 5'-CGCGAATTCGCAACT<br>ACCATTAACAACCTT-3' |
| HAT22/ABIG1 OX                     | 5'-CGCGTCGACATGGGT<br>CTTGATGATTCATG-3'    | 5'-ATACCCGGGCTAACA<br>TGCTGCAGAAGGAT-3'  |
| $\Delta$ N52 HAT22/ABIG1<br>OX     | 5'-CGCGTCGACATGGAGA<br>GCTACAAGATCAAGAC-3' | 5'-ATACCCGGGCTAACA<br>TGCTGCAGAAGGAT-3'  |
| GAL4 AD-<br>HAT22/ABIG1            | 5'-CGCGAATTCATGGGT<br>CTTGATGATTCATG-3'    | 5'-GCAGGATCCCTAACA<br>TGCTGCAGAAGGAT-3'  |
| GAL4 BD-<br>HAT22/ABIG1            | 5'-CGCGAATTCATGGGT<br>CTTGATGATTCATG-3'    | 5'-GTGGTCGACCTAACA<br>TGCTGCAGAAGGAT-3'  |
| sGFP-HAT22/ABIG1                   | 5'-CGCGTCGACATGGGT<br>CTTGATGATTCATG-3'    | 5'-ATACCCGGGCTAACA<br>TGCTGCAGAAGGAT-3'  |
| sGFP- $\Delta$ N52<br>HAT22/ABIG1  | 5'-CGCGTCGACATGGAGA<br>GCTACAAGATCAAGAC-3' | 5'-ATACCCGGGCTAACA<br>TGCTGCAGAAGGAT-3'  |



**Table S4.** List of primers for quantitative RT-PCR

| Gene               | Forward                    | Reverse                    |
|--------------------|----------------------------|----------------------------|
| <i>GAPc</i>        | 5'-GTGTCCCAACCGTTGATGTC-3' | 5'-TCCCTTGAGTTTGCCTTCGG-3' |
| <i>HAT22/ABIG1</i> | 5'-GGTGTGTTCGAGAGTGAGTG-3' | 5'-GTTATCTTCGAGAAGAGCAG-3' |
| <i>RD29A</i>       | 5'-CCTGAAGTGATCGATGCACC-3' | 5'-CAGTGGGTTTGGTGTAATCG-3' |
| <i>ADHI</i>        | 5'-TGAATGTGGCTAAACCCAAG-3' | 5'-CCTAGAAGCACCAGCGATTC-3' |
